# Supplementary material for: Association of hyperlipidaemia, inflammation and serological status and coronary heart disease among patients with rheumatoid arthritis: data from the National Veterans Health Administration
Source: HighWire-hosted journal article supplement (doi:10.1136/annrheumdis-2013-204987), 2015-01-22
Supplement: annrheumdis-2013-204987supp.pdf [file annrheumdis-2013-204987supp.pdf]

**Appendix: Unadjusted Incidence Rates for Hospitalized MI Stratified by levels of Inflammatory Markers and Lipid Levels and by Gender**

|                                | All          |                     |                                   |         | Female  |         |                  |         | Male    |          |                  |         |
|--------------------------------|--------------|---------------------|-----------------------------------|---------|---------|---------|------------------|---------|---------|----------|------------------|---------|
|                                | # Event      | # Person-years (PY) | Incidence Rate (IR) per 1,000 PYs | p-Trend | # Event | # PY    | IR per 1,000 PYs | p-Trend | # Event | # PY     | IR per 1,000 PYs | p-Trend |
| <b>LDL-cholesterol (mg/dL)</b> | <b>N=560</b> |                     |                                   |         |         |         |                  |         |         |          |                  |         |
| <100                           | 288          | 80512.45            | 3.6(3.2-4.0)                      | 0.69    | 5       | 5913.97 | 1.2(0.7-1.9)     | 0.70    | 283     | 74598.48 | 3.8(3.4-4.2)     | 0.47    |
| ≥100 <130                      | 169          | 48001.96            | 3.5(3.0-4.1)                      |         | 9       | 5107.01 | 1.2(0.7-1.9)     |         | 160     | 42894.95 | 3.8(3.3-4.4)     |         |
| ≥130 <160                      | 65           | 20527.43            | 3.2(2.5-4.0)                      |         | 3       | 2471.77 | 1.1(0.7-1.8)     |         | 62      | 18055.65 | 3.5(2.7-4.4)     |         |
| ≥160                           | 38           | 6733.90             | 5.6(4.1-7.8)                      |         | 1       | 1082.35 | 2.0(1.2-3.5)     |         | 37      | 5651.55  | 6.3(4.6-8.7)     |         |
| <b>HDL-cholesterol (mg/dL)</b> | <b>N=568</b> |                     |                                   |         |         |         |                  |         |         |          |                  |         |
| ≥60                            | 50           | 21175.35            | 2.4(1.8-3.1)                      | <0.0001 | 6       | 4675.83 | 1.1(0.6-1.7)     |         | 44      | 16499.52 | 2.7(2.1-3.6)     |         |
| ≥50 <59                        | 74           | 25747.01            | 2.9(2.3-3.6)                      |         | 3       | 3589.74 | 1.2(0.7-2.0)     |         | 71      | 22157.27 | 3.1(2.5-4.0)     |         |
| ≥40 <50                        | 148          | 46538.45            | 3.2(2.7-3.7)                      |         | 3       | 4005.02 | 1.3(0.8-2.1)     |         | 145     | 42533.43 | 3.4(2.9-3.9)     |         |
| <40                            | 296          | 64162.84            | 4.6(4.1-5.2)                      |         | 7       | 2444.57 | 1.8(1.1-2.9)     | 0.34    | 289     | 61718.27 | 4.7(4.2-5.3)     | <0.0001 |
| <b>CRP (mg/dL)</b>             | <b>N=334</b> |                     |                                   |         |         |         |                  |         |         |          |                  |         |
| ≤0.34                          | 60           | 25242.73            | 3.3(2.6-4.1)                      | <0.0001 | 6       | 2791.50 | 1.2(0.7-2.2)     | 0.35    | 54      | 22451.23 | 3.5(2.8-4.4)     | <0.0001 |
| > 0.34 ≤0.71                   | 81           | 24783.99            | 3.7(3.0-4.6)                      |         | 4       | 2769.48 | 1.4(0.8-2.5)     |         | 77      | 22014.52 | 4.0(3.2-4.9)     |         |
| >0.714 ≤1.8                    | 86           | 23115.69            | 2.4(1.8-3.1)                      |         | 1       | 2462.57 | 0.9(0.5-1.6)     |         | 85      | 20653.12 | 2.6(2.0-3.3)     |         |
| >1.8                           | 107          | 20570.28            | 5.2(4.3-6.3)                      |         | 1       | 1544.86 | 1.9(1.0-3.4)     |         | 106     | 19025.42 | 5.5(4.5-6.6)     |         |
| <b>ESR (mm/hr)</b>             | <b>N=346</b> |                     |                                   |         |         |         |                  |         |         |          |                  |         |
| ≤ 10                           | 78           | 29900.25            | 3.0(2.4-3.8)                      | <0.0001 | 0       | 2174.92 | 1.0(0.5-1.8)     | 0.03    | 78      | 27725.33 | 3.3(2.6-4.1)     | <0.0001 |
| >10 ≤ 22                       | 76           | 25110.13            | 3.6(2.9-4.5)                      |         | 3       | 2944.22 | 1.2(0.4-2.1)     |         | 73      | 22165.91 | 4.0(3.2-4.9)     |         |
| >22 ≤42                        | 90           | 24858.49            | 2.6(2.1-3.3)                      |         | 4       | 3188.53 | 0.8(0.4-1.5)     |         | 86      | 21669.95 | 2.7(2.2-3.4)     |         |
| >42                            | 102          | 21376.23            | 4.8(3.9-5.8)                      |         | 5       | 2282.79 | 1.5(0.9-2.8)     |         | 97      | 19093.43 | 5.2(4.2-6.3)     |         |
| <b>Serologic Status</b>        | <b>N=597</b> |                     |                                   |         |         |         |                  |         |         |          |                  |         |
| Seronegative                   | 111          | 41174.52            | 2.7(2.2-3.2)                      |         | 7       | 5180.34 | 0.9(0.6-1.5)     |         | 104     | 35994.18 | 2.9(2.4-3.6)     |         |
| Seropositive                   | 313          | 89646.87            | 3.5(3.1-3.9)                      |         | 9       | 8038.87 | 1.2(0.8-1.9)     |         | 304     | 81608.01 | 3.7(3.3-4.2)     |         |
| No Serology                    | 173          | 42720.51            | 4.0(3.5-4.7)                      |         | 3       | 3374.39 | 1.4(0.9-2.2)     |         | 170     | 39346.11 | 4.3(3.7-5.0)     |         |

Note: LDL and HDL stratified per Adult Treatment Panel (ATP) III guidelines; CRP and ESR stratified by quartiles. MI = myocardial infarction; ESR = erythrocyte sedimentation rate; CRP = C-reactive protein; LDL = low density lipoprotein; HDL = high density lipoprotein; IR = incident rate; Seropositive = rheumatoid factor and/or anti-cyclic citrullinated peptide positive; Seronegative = both tests negative.
